# Supplementary material
Source: Springer Nature journal article supplement (https://www.springerprofessional.de/resource/supplementary/13638_2010_36_MOESM3_ESM.pdf/11897304)

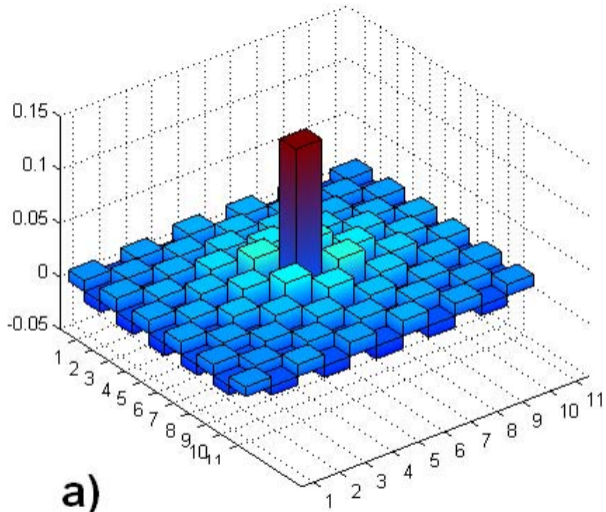

a)

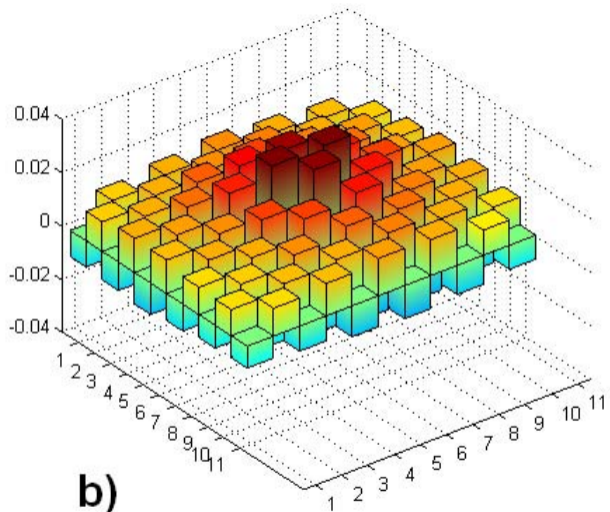

b)

Supplement: MOESM3 [file 11897304]
